# Supplementary material
Source: PubMed Central journal article supplement (PMC6340784)
Supplement: NIHMS1500570-supplement-11325_2018_1690_MOESM1_ESM.pdf [file NIHMS1500570-supplement-11325_2018_1690_MOESM1_ESM.pdf]

## Smartphone Based Delivery Of Oropharyngeal Exercises For Treatment Of Snoring: A Randomized Controlled Trial

Authors: Umesh Goswami<sup>1,2\*</sup>, Adam Black<sup>3\*</sup>, Brian Krohn<sup>3</sup>, Wendy Meyers<sup>1,2</sup>, Conrad Iber<sup>1,2</sup>

1. *Division of Pulmonary, Allergy, Critical Care and Sleep Medicine, University of Minnesota, Minneapolis, MN/US*

2. *Fairview Sleep Centers, Minneapolis, MN/US*

3. *Medical Devices Center, University of Minnesota, Minneapolis, MN/US*

Correspondence: goswa009@umn.edu

### Cross-over patient results

Only one participant initially in the control group successfully continued the study with 12 weeks in the control arm and then 6 weeks in the intervention arm. A statistically significant reduction the percent snoring, snoring rate, duration above 60db and 65db (online resource1)

| Characteristic                | Control Period | Experimental Period | Difference | % Difference | P-Value |
|-------------------------------|----------------|---------------------|------------|--------------|---------|
| Snore Percentage (%)          | 20.586         | 12.896              | -7.69      | -37%         | 0.0039  |
| Snore Rate (per Hour)         | 353.905        | 265.931             | -87.974    | -25%         | 0.0253  |
| Average Snore Intensity (dBA) | 61.771         | 60.928              | -0.843     | -1%          | 0.0475  |
| Snore Duration > 60 dBA (min) | 20.053         | 11.942              | -8.111     | -40%         | 0.0048  |
| Snore Duration > 65 dBA (min) | 10.562         | 5.633               | -4.928     | -47%         | 0.0137  |
| Snore                         | 3.63           | 1.685               | -1.945     | -54%         | 0.0568  |

---

|                            |       |       |        |      |        |
|----------------------------|-------|-------|--------|------|--------|
| Duration > 70<br>dBA (min) |       |       |        |      |        |
| Snore                      | 0.638 | 0.339 | -0.299 | -47% | 0.2418 |
| Duration > 75<br>dBA (min) |       |       |        |      |        |

---

Data presented as mean±SD unless otherwise noted

P-values are for comparison of the 2 groups (absolute values) using unpaired t-test
