# Supplementary material
Source: PubMed Central journal article supplement (PMC6340784)
Supplement: NIHMS1500570-supplement-11325_2018_1690_MOESM4_ESM.pdf [file NIHMS1500570-supplement-11325_2018_1690_MOESM4_ESM.pdf]

## Smartphone Based Delivery Of Oropharyngeal Exercises For Treatment Of Snoring: A Randomized Controlled Trial

Authors: Umesh Goswami<sup>1,2\*</sup>, Adam Black<sup>3\*</sup>, Brian Krohn<sup>3</sup>, Wendy Meyers<sup>1,2</sup>, Conrad Iber<sup>1,2</sup>

1. *Division of Pulmonary, Allergy, Critical Care and Sleep Medicine, University of Minnesota, Minneapolis, MN/US*

2. *Fairview Sleep Centers, Minneapolis, MN/US*

3. *Medical Devices Center, University of Minnesota, Minneapolis, MN/US*

Correspondence: goswa009@umn.edu

### Post study Questionnaire

User:

Did you use an oral appliance during the study:

Dates you were sick:

Other concerns or issues with data:

### Snore Assessment for the Study Participant's Bedpartner

Please circle the number below that represents the state of the study participant's snoring now compared to the start of the trial:

Their snoring **volume** has:

|                    |                     |                    |                       |                      |             |
|--------------------|---------------------|--------------------|-----------------------|----------------------|-------------|
| Greatly<br>Reduced | Slightly<br>Reduced | Stayed<br>the same | Slightly<br>Increased | Greatly<br>Increased | Not<br>Sure |
|--------------------|---------------------|--------------------|-----------------------|----------------------|-------------|

Their snoring **frequency** has:

|                    |                     |                    |                       |                      |             |
|--------------------|---------------------|--------------------|-----------------------|----------------------|-------------|
| Greatly<br>Reduced | Slightly<br>Reduced | Stayed<br>the same | Slightly<br>Increased | Greatly<br>Increased | Not<br>Sure |
|--------------------|---------------------|--------------------|-----------------------|----------------------|-------------|

**Comments:**

### Snore Assessment for the Study Participant

Please circle the statement below that represents the state of your snoring now compared to the start of the trial:

My snoring **volume** has:

|                    |                     |                    |                       |                      |             |
|--------------------|---------------------|--------------------|-----------------------|----------------------|-------------|
| Greatly<br>Reduced | Slightly<br>Reduced | Stayed<br>the same | Slightly<br>Increased | Greatly<br>Increased | Not<br>Sure |
|--------------------|---------------------|--------------------|-----------------------|----------------------|-------------|

My snoring **frequency** has:

|                    |                     |                    |                       |                      |             |
|--------------------|---------------------|--------------------|-----------------------|----------------------|-------------|
| Greatly<br>Reduced | Slightly<br>Reduced | Stayed<br>the same | Slightly<br>Increased | Greatly<br>Increased | Not<br>Sure |
|--------------------|---------------------|--------------------|-----------------------|----------------------|-------------|

**Comments:**

### SnoreX's impact on sleep

Please circle the number below that represents **Snore X's impact** on your sleep:  
With SnoreX's use my sleep is **more continuous**:

Strongly Disagree ---1-----2-----3-----4-----5--- Strongly Agree

With Snore X's use I am **less sleepy** throughout the daytime:

Strongly Disagree ---1-----2-----3-----4-----5--- Strongly Agree

With Snore X's use my throat is **less dry/painful** in the morning:

Strongly Disagree ---1-----2-----3-----4-----5--- Strongly Agree
